# Supplementary material for: Electronic transport and polarization-dependent photoresponse in few-layered hafnium trisulfide (HfS3) nanoribbons
Source: Royal Society of Chemistry journal article supplement (doi:10.1039/d3tc00773a), 2023-01-01
Supplement: d3tc00773a1.pdf [file d3tc00773a1.pdf]

Electronic supplementary information (ESI)

**Electronic transport and polarization-dependent photoresponse in few-layered  
hafnium trisulfide (HfS<sub>3</sub>) nanoribbons**

Alexey Lipatov,<sup>1,2,3\*</sup> Jehad Abourahma,<sup>1</sup> Gauthami Viswan,<sup>4</sup> Khimananda Acharya,<sup>5</sup> Tula R. Paudel,<sup>5\*</sup> Michael J. Loes,<sup>1</sup> Saman Bagheri,<sup>1</sup> Alpha T. N'Diaye,<sup>6</sup> Esha Mishra,<sup>4</sup> Thilini Kumari Ekanayaka,<sup>4</sup> Mohammad Zaz,<sup>4</sup> Jack Rodenburg,<sup>4</sup> Archit Dhingra,<sup>4</sup> Robert Streubel,<sup>4,7</sup> Peter A. Dowben,<sup>4,7</sup> and Alexander Sinitskii<sup>1,7\*</sup>

<sup>1</sup> Department of Chemistry, University of Nebraska-Lincoln, Lincoln, NE 68588, USA

<sup>2</sup> Department of Chemistry, Biology and Health Sciences, South Dakota School of Mines and Technology, Rapid City, SD 57701, USA

<sup>3</sup> Karen M. Swindler Department of Chemical and Biological Engineering, South Dakota School of Mines and Technology, Rapid City, SD 57701, USA

<sup>4</sup> Department of Physics and Astronomy, University of Nebraska-Lincoln, Lincoln, NE 68588, USA

<sup>5</sup> Department of Physics, South Dakota School of Mines and Technology, Rapid City, SD 57701, USA

<sup>6</sup> Advanced Light Source, Lawrence Berkeley National Laboratory, Berkeley, CA 94720, USA

<sup>7</sup> Nebraska Center for Materials and Nanoscience, University of Nebraska-Lincoln, Lincoln, NE 68588, USA

\*E-mails: [alexey.lipatov@sdsmt.edu](mailto:alexey.lipatov@sdsmt.edu), [tula.paudel@sdsmt.edu](mailto:tula.paudel@sdsmt.edu), [sinitskii@unl.edu](mailto:sinitskii@unl.edu)

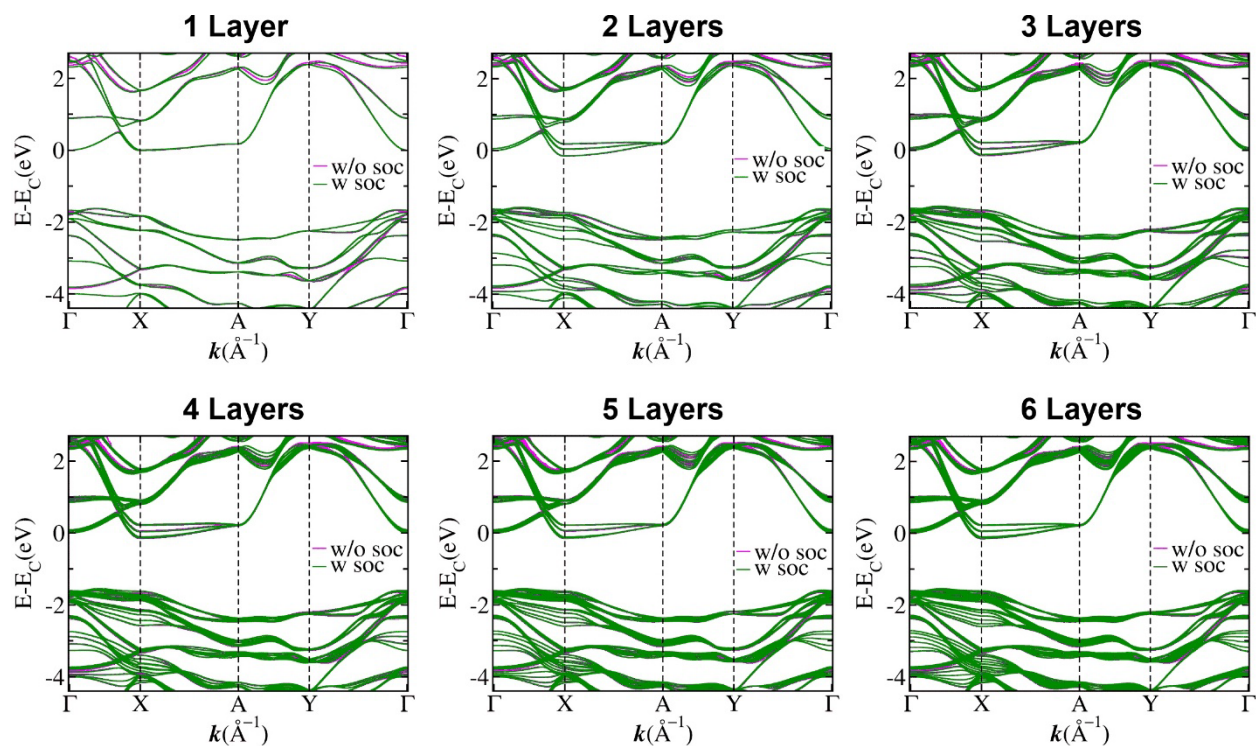

**Figure S1.** A comparison of the band structures of infinite two-dimensional HfS<sub>3</sub> crystals consisting of 1, 2, 3, 4, 5 and 6 monolayers. The band structures were calculated with (green) and without (red) the effect of spin-orbit coupling (SOC).
